# Supplementary material
Source: PubMed Central journal article supplement (PMC1065712)

TSSSAEGVVVASEpSPVIAPHGSTHAR

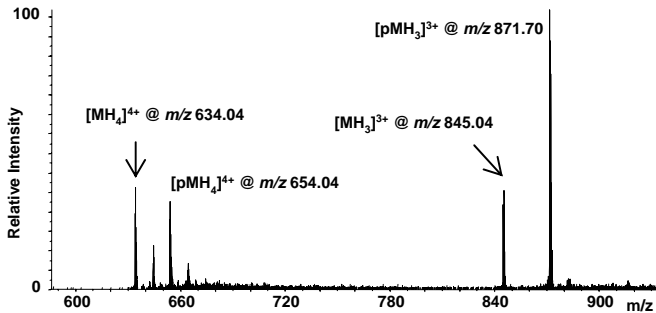

Supplement: pnas_102_11_3948__2.pdf [file pnas_102_11_3948__2.pdf]
